# Supplementary material for: Nanoparticle delivery of grape seed-derived proanthocyanidins to airway epithelial cells dampens oxidative stress and inflammation
Source: Springer Nature journal article supplement (doi:10.1186/s12967-018-1509-4), 2018-05-23

Ctrl

Treated

day 1

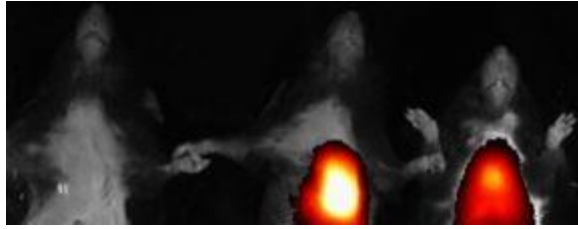

day 2

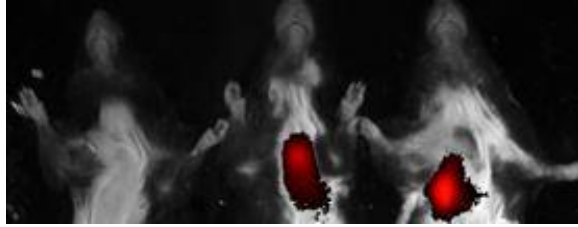

day 3

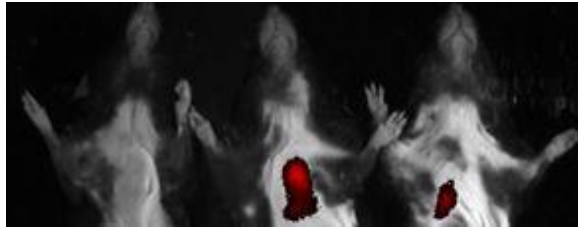

day 6

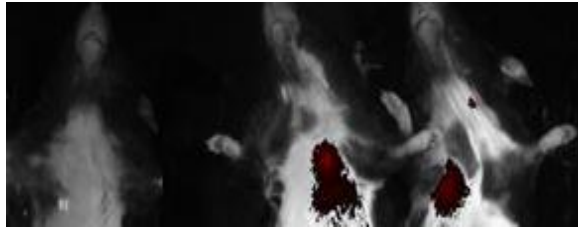

Supplement: MOESM1 [file 15786112]
